# Supplementary material for: Effects of combined calcium and vitamin D supplementation on osteoporosis in postmenopausal women: a systematic review and meta-analysis of randomized controlled trials
Source: Royal Society of Chemistry journal article supplement (doi:10.1039/d0fo00787k), 2020-01-01
Supplement: d0fo00787k1.pdf [file d0fo00787k1.pdf]

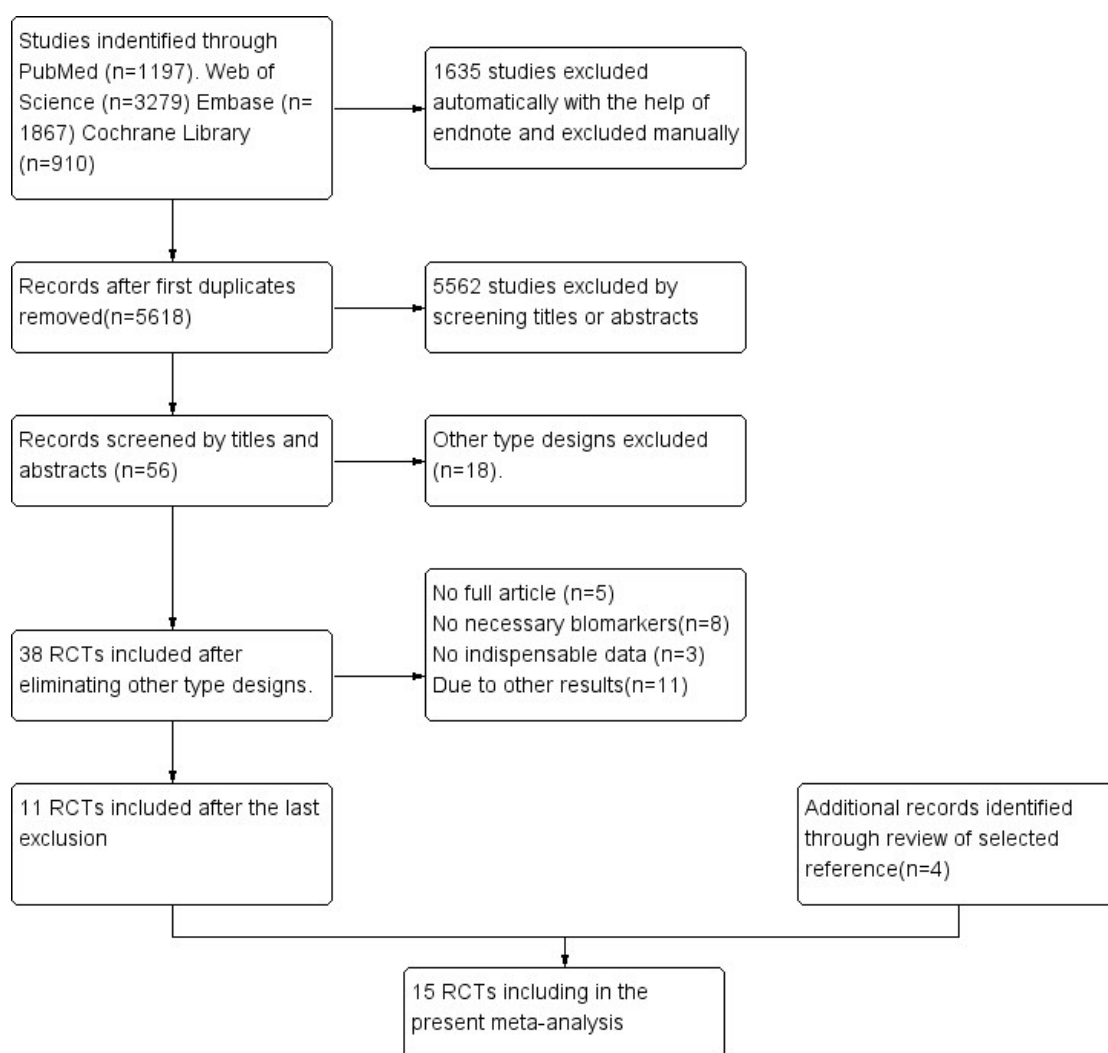

Fig. S1 Flow diagram of the study selection procedure

RCTs: randomized controlled trials

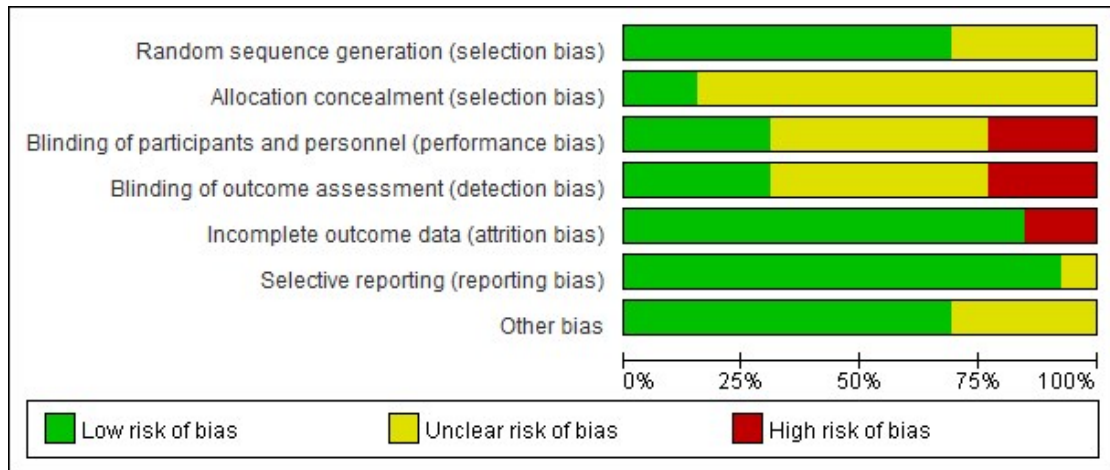

Fig. S2 Risk of bias graph: review authors' judgements about each risk of bias item presented as percentages across all included studies

|                       | Random sequence generation (selection bias) | Allocation concealment (selection bias) | Blinding of participants and personnel (performance bias) | Blinding of outcome assessment (detection bias) | Incomplete outcome data (attrition bias) | Selective reporting (reporting bias) | Other bias |
|-----------------------|---------------------------------------------|-----------------------------------------|-----------------------------------------------------------|-------------------------------------------------|------------------------------------------|--------------------------------------|------------|
| Balton et al.2007     | +                                           | +                                       | +                                                         | +                                               | +                                        | ?                                    | +          |
| Bess et al.1997       | +                                           | +                                       | +                                                         | +                                               | +                                        | ?                                    | +          |
| Bolland et al.2011    | +                                           | ?                                       | +                                                         | +                                               | +                                        | +                                    | +          |
| Chee et al.2003       | ?                                           | ?                                       | ?                                                         | ?                                               | +                                        | +                                    | ?          |
| Dawson et al.2000     | +                                           | +                                       | +                                                         | +                                               | +                                        | ?                                    | +          |
| Grados et al.2003     | ?                                           | ?                                       | +                                                         | +                                               | +                                        | +                                    | +          |
| Jackson et al.2006    | +                                           | ?                                       | +                                                         | +                                               | +                                        | +                                    | ?          |
| Karkkainen et al.2010 | +                                           | +                                       | -                                                         | -                                               | -                                        | +                                    | +          |
| Lau et al.2002        | ?                                           | ?                                       | ?                                                         | ?                                               | +                                        | +                                    | ?          |
| Moschonis et al.2006  | +                                           | ?                                       | ?                                                         | ?                                               | +                                        | +                                    | +          |
| Moschonis et al.2010  | +                                           | ?                                       | ?                                                         | ?                                               | +                                        | +                                    | +          |
| Moschonis et al.2011  | ?                                           | ?                                       | ?                                                         | ?                                               | -                                        | +                                    | ?          |
| Porthouse et al.2005  | +                                           | ?                                       | -                                                         | -                                               | +                                        | +                                    | +          |
| Salovaara et al.2010  | +                                           | +                                       | -                                                         | -                                               | +                                        | +                                    | +          |
| Sullivan et al.2017   | +                                           | ?                                       | ?                                                         | ?                                               | +                                        | +                                    | +          |

Fig. S3 Risk of bias summary: review authors' judgements about each risk of bias item for each included study.

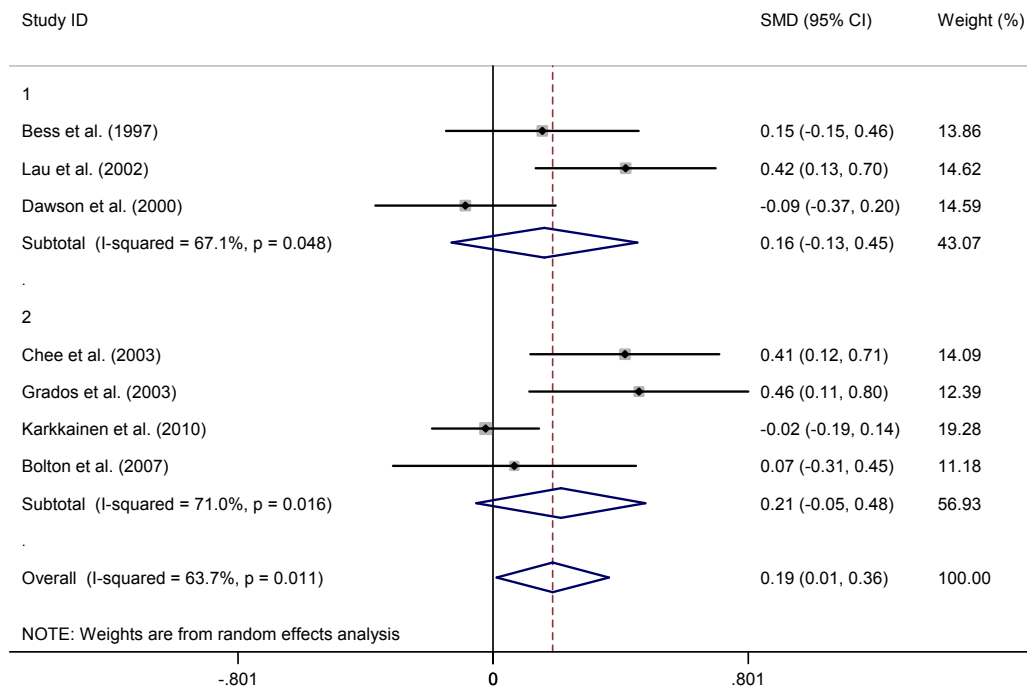

Fig. S4 Subgroup analysis of the effect of vitamin D combined with calcium on the femoral neck BMD change

The “1” means the calcium intake is no more than 1000 mg/d; the “2” means the calcium intake is more than 1000 mg/d.

Fig. S5-8 was the figures of sensitivity analysis.

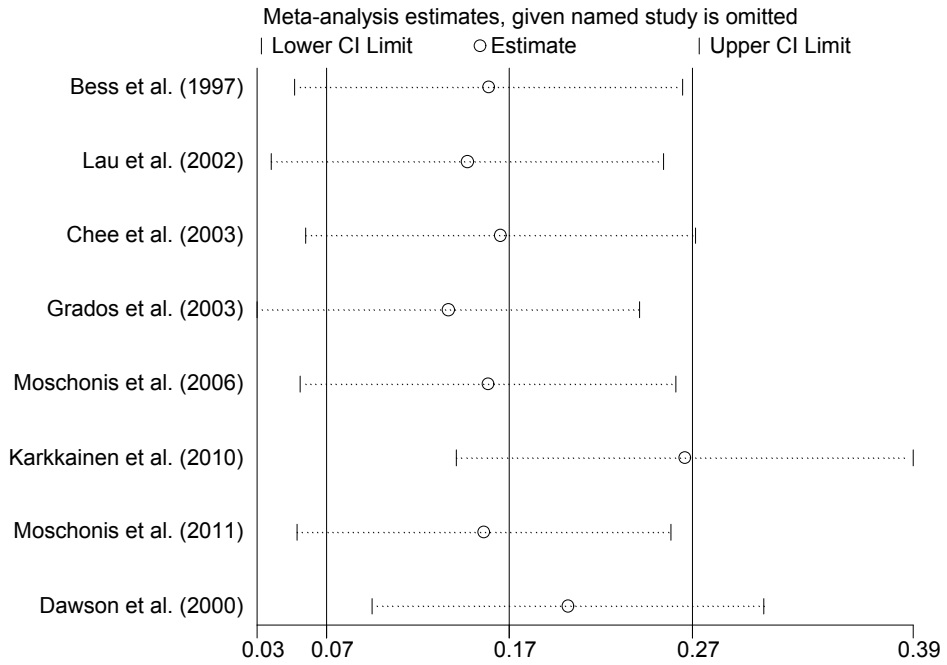

Fig. S5 Sensitivity analysis for combined calcium and vitamin D on lumbar spine BMD

Abbreviations: BMD, bone mineral density.

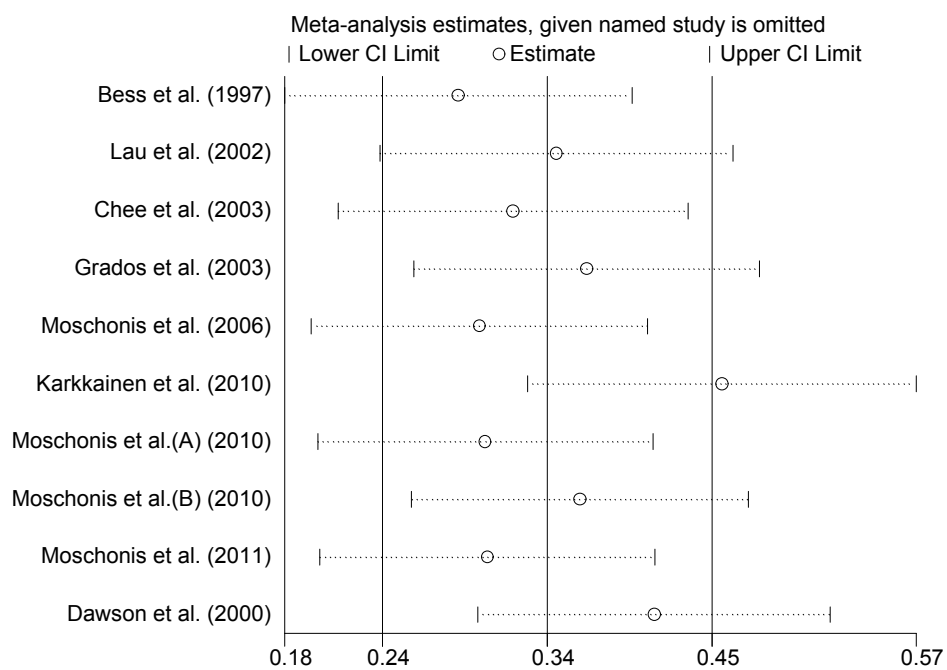

Fig. S6 Sensitivity analysis for combined calcium and vitamin D on total body BMD

Abbreviations: BMD, bone mineral density.

The A means the first 12 months of the study. The B means 12-30 months of the study.

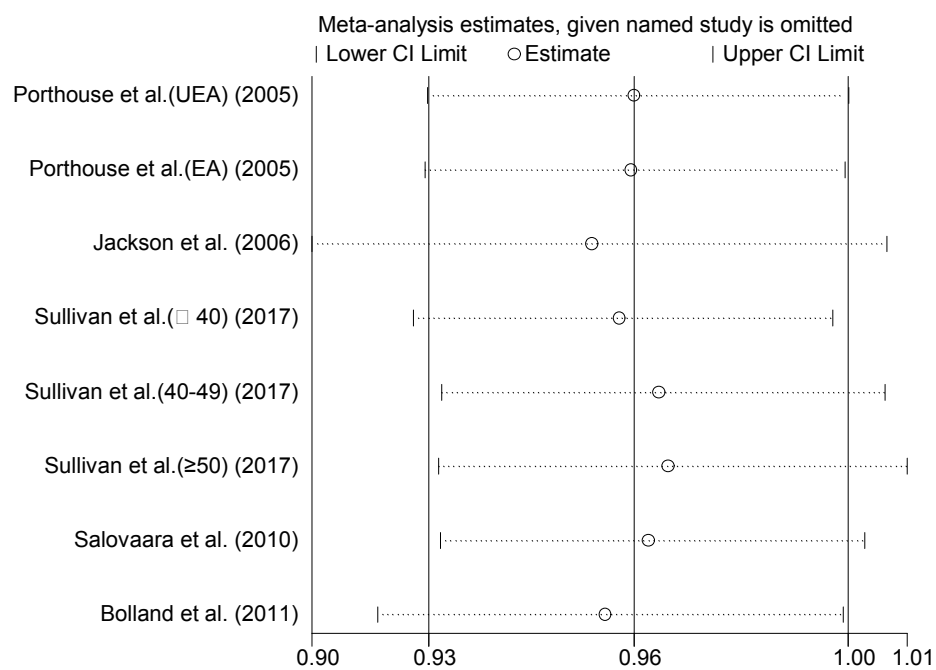

Fig. S7 Sensitivity analysis for combined calcium and vitamin D on total fracture

(<40) means the age of menopause is less than 40. (40-49) means the age of menopause is between 40 and 49. (≥50) means the age of menopause is equal or greater than 50. UEA means unequally allocated group. EA means equally allocated group.

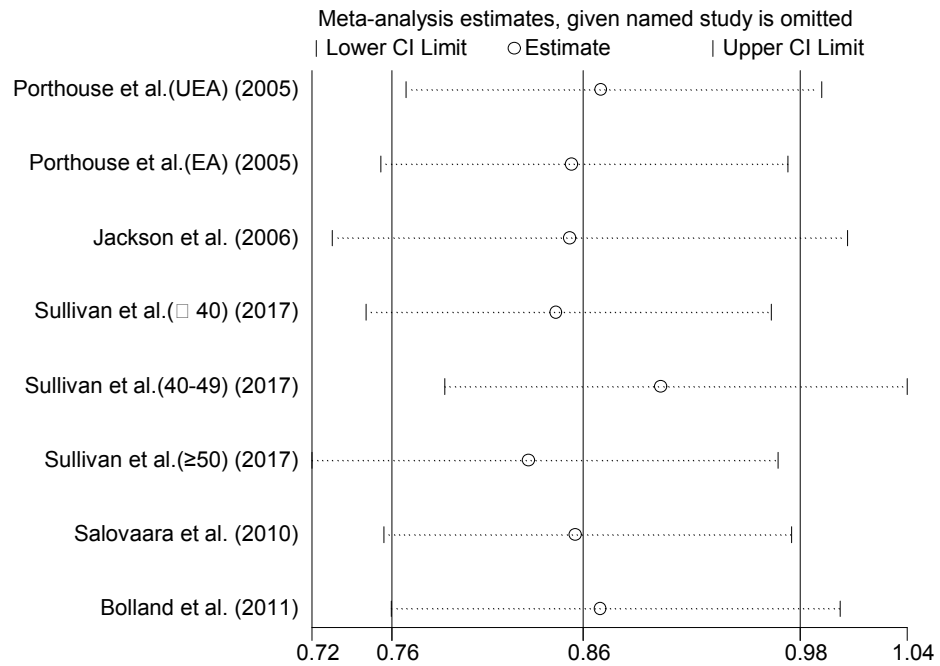

Fig. S8 Sensitivity analysis for combined calcium and vitamin D on hip fracture

(<40) means the age of menopause is less than 40. (40-49) means the age of menopause is between 40 and 49. ( $\geq 50$ ) means the age of menopause is equal or greater than 50. UEA means unequally allocated group. EA means equally allocated group.



Fig. S9-13 was the funnel plots that evaluated by Begg's test.

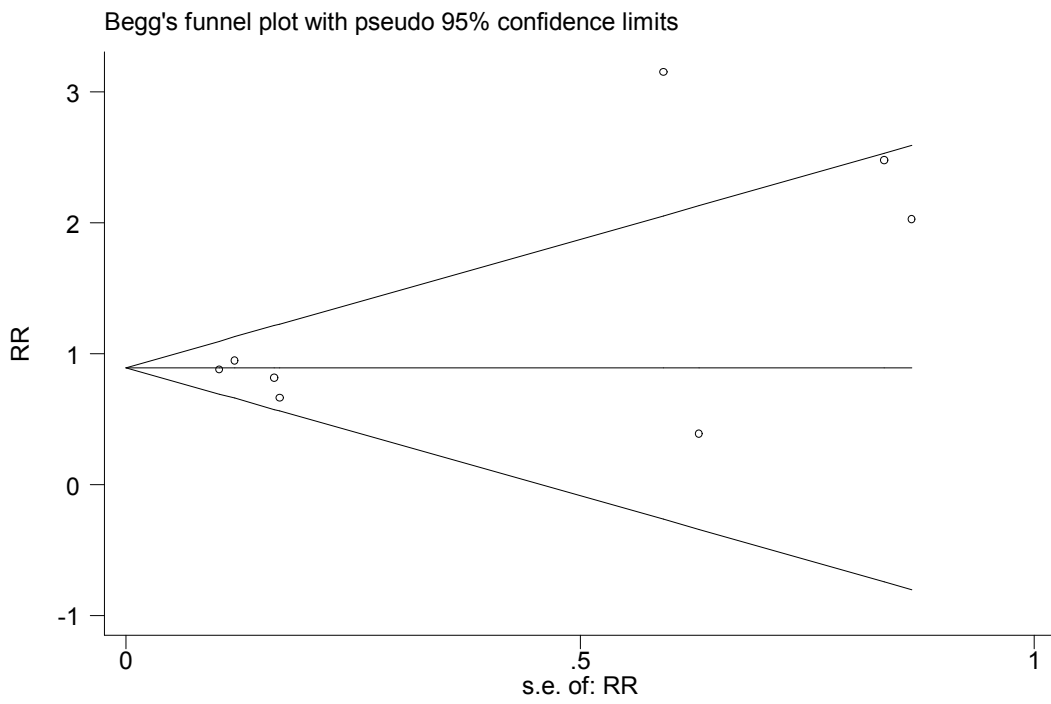

Fig. S9 Funnel plot for combined calcium and vitamin D on hip fracture

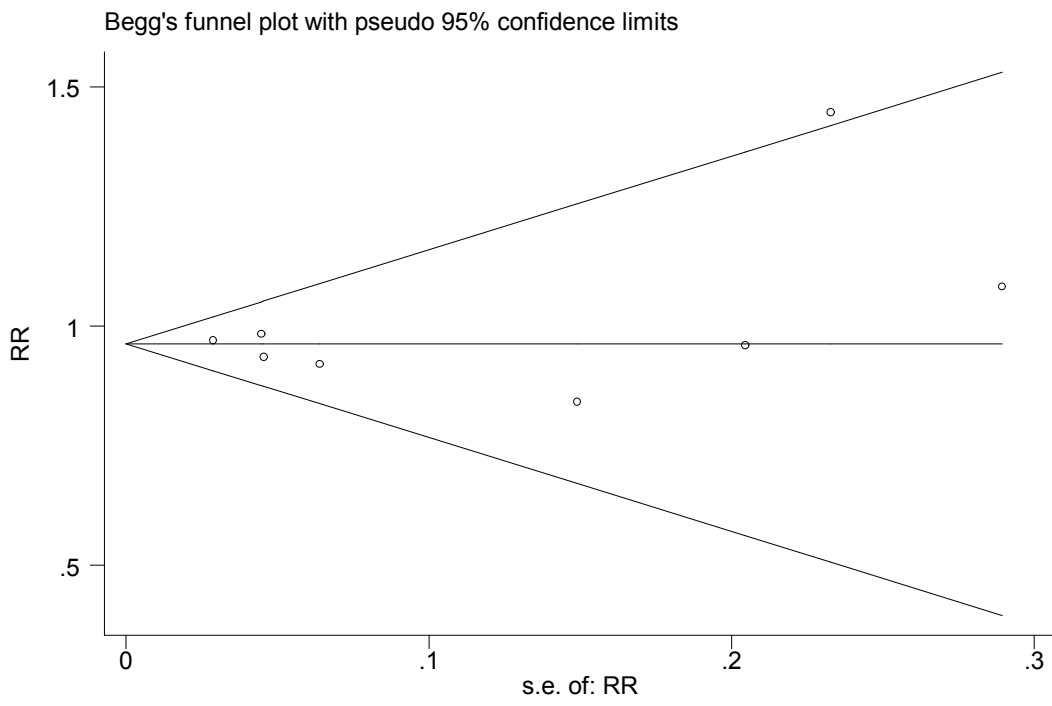

Fig. S10 Funnel plot for combined calcium and vitamin D on total fracture

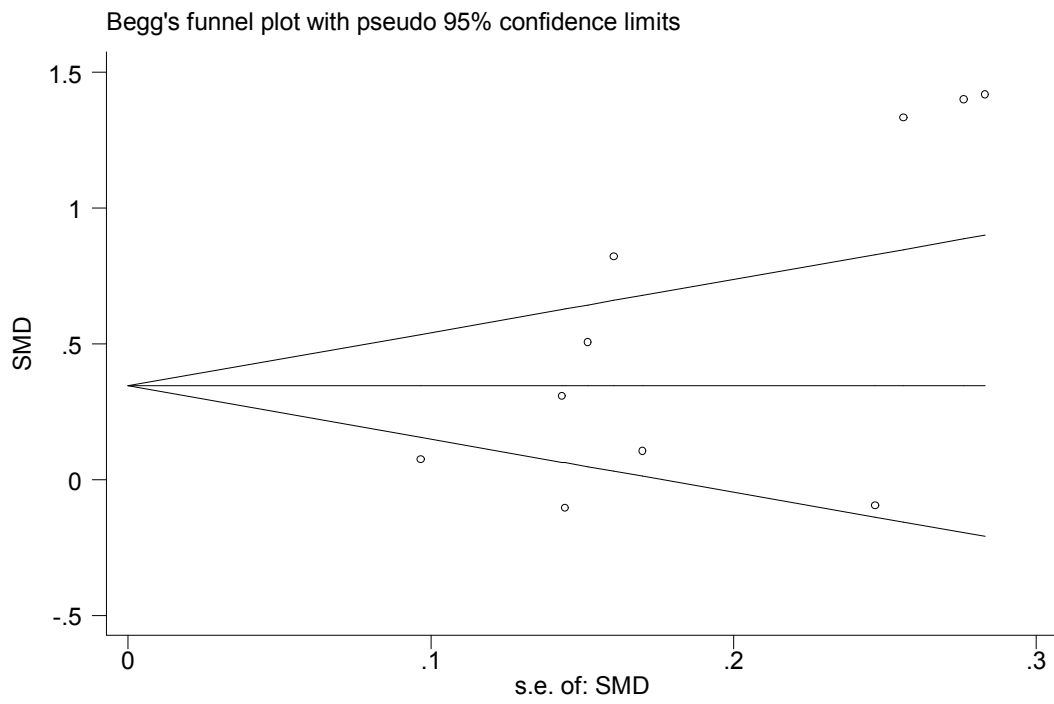

Fig. S11 Funnel plot for combined calcium and vitamin D on total BMD

Abbreviations: BMD, bone mineral density.

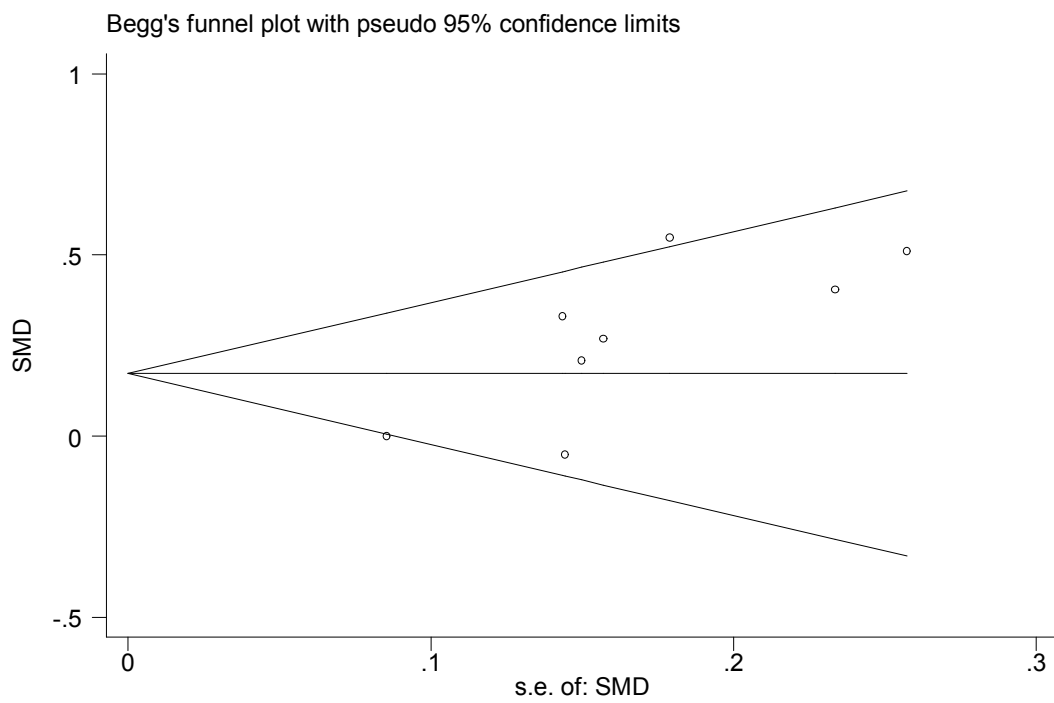

Fig. S12 Funnel plot for combined calcium and vitamin D on lumbar spine BMD

Abbreviations: BMD, bone mineral density.

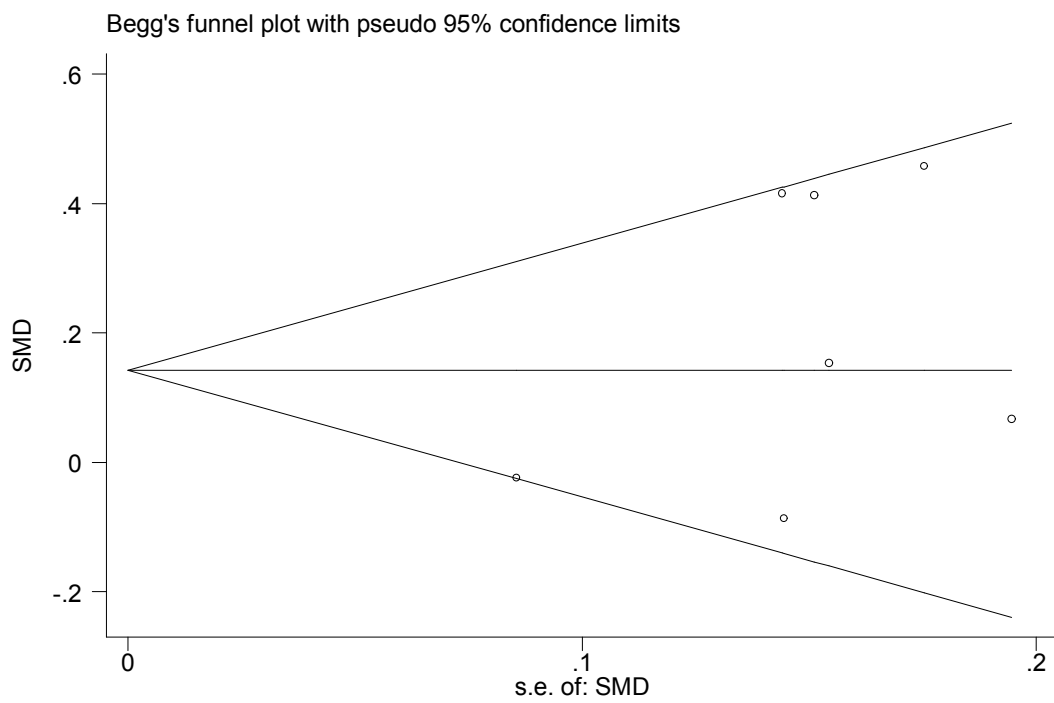

Fig. S13 Funnel plot for combined calcium and vitamin D on femoral neck BMD

Abbreviations: BMD, bone mineral density.
